# Supplementary material for: Size dependence of ultrafast charge dynamics in monodisperse Au nanoparticles supported on TiO2 colloidal spheres
Source: Royal Society of Chemistry journal article supplement (doi:10.1039/c4cp01475h), 2014-01-01
Supplement: c4cp01475h1.pdf [file c4cp01475h1.pdf]

## Electronic Supplementary Information (ESI)

### Size-dependence of ultrafast charge dynamics in monodisperse Au nanoparticles supported on TiO<sub>2</sub> colloidal spheres

Ali Al-Otaify,<sup>a</sup> Marina A. Leontiadou,<sup>\*a</sup> Flavia V. E. dos Reis,<sup>b</sup> Tatiana C. Damato,<sup>b</sup> Pedro H. C. Camargo,<sup>b</sup> and David J. Binks<sup>a</sup>

<sup>a</sup> School of Physics and Astronomy & Photon Science Institute,  
University of Manchester, Oxford Road, Manchester, M13 9PL, UK.

E-mail: marina.leontiadou@manchester.ac.uk; Fax: +44(0)1612751001; Tel: +44(0)1612754089

<sup>b</sup> Departamento de Química Fundamental, Instituto de Química, Universidade de São Paulo, São Paulo 05508-000, Brazil.

#### 1. The fractional transmittance changes, $\Delta T(t)/T$ , for samples TiO<sub>2</sub>-Au1 and TiO<sub>2</sub>-Au3

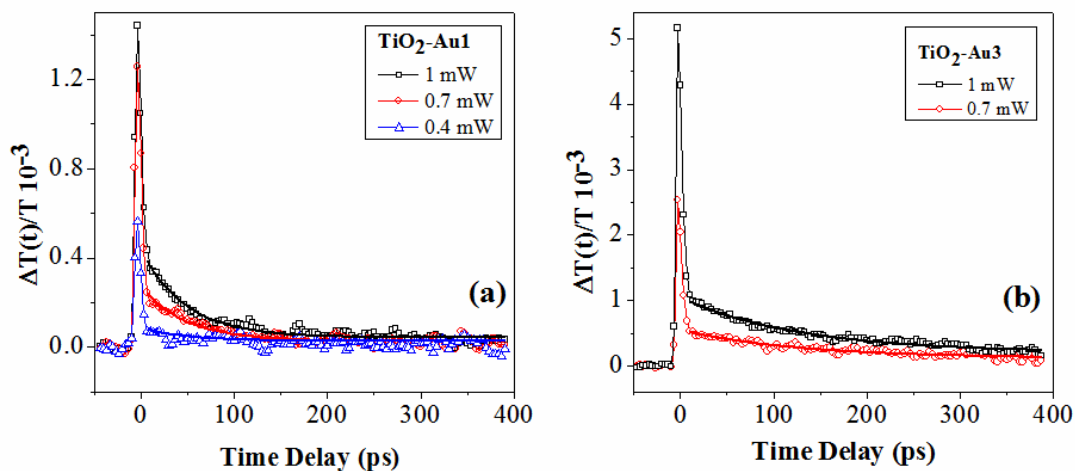

**Figure S1.** Transmittance transients at 530 nm when induced by different pump powers of 370 nm for (a) TiO<sub>2</sub>-Au1 and (b) TiO<sub>2</sub>-Au3 samples. Solid lines are the global fit to the transients.
